# Supplementary material for: The true atomistic structure of a disordered crystal: a computational study on the photon upconverting material β-NaYF4 and its Er3+-, Tm3+-, and Yb3+-doped derivates
Source: Royal Society of Chemistry journal article supplement (doi:10.1039/d4nr04880f), 2025-01-01
Supplement: d4nr04880f1.pdf [file d4nr04880f1.pdf]

## Electronic Supplementary Information (ESI)

# The true atomistic structure of a disordered crystal: A computational study on the photon upconverting material $\beta$ -NaYF<sub>4</sub> and its Er<sup>3+</sup>-, Tm<sup>3+</sup>-, and Yb<sup>3+</sup>-doped derivatives

Chris Steve Conrad,<sup>a,b</sup> Holger Euchner,<sup>a</sup> Eva Hemmer,<sup>b,\*</sup> Reinhold F. Fink<sup>a,\*</sup>

<sup>a</sup> Institute of Physical and Theoretical Chemistry, University of Tübingen, Tübingen (Baden-Württemberg), Germany.

<sup>b</sup> Department of Chemistry and Biomolecular Sciences, University of Ottawa, Ottawa (Ontario), Canada.

\* Corresponding Authors E-mail:

Reinhold.fink@uni-tuebingen.de

ehemmer@uottawa.ca

### Table of Contents

|   |                                                                                                                                             |    |
|---|---------------------------------------------------------------------------------------------------------------------------------------------|----|
| 1 | $\beta$ -NaYF <sub>4</sub> 2x2x2 Supercell.....                                                                                             | 2  |
| 2 | LiYF <sub>4</sub> 3x3x1 Supercell.....                                                                                                      | 3  |
| 3 | Additional Structural Parameters for $\beta$ -NaYF <sub>4</sub> doped with Er <sup>3+</sup> , Tm <sup>3+</sup> , and Yb <sup>3+</sup> ..... | 4  |
| 4 | LiYF <sub>4</sub> Input File.....                                                                                                           | 5  |
| 5 | $\beta$ -NaYF <sub>4</sub> Input File.....                                                                                                  | 7  |
| 6 | LiYF <sub>4</sub> Optimised Structure.....                                                                                                  | 10 |
| 7 | $\beta$ -NaYF <sub>4</sub> Optimised Structure (configuration 10) .....                                                                     | 14 |

## 1 $\beta$ -NaYF<sub>4</sub> 2x2x2 Supercell

To accurately represent the influence of the cation disorder on the F<sup>-</sup> sites (and thereby on the potential cationic doping sites), initially, a 2x2x2 supercell of  $\beta$ -NaYF<sub>4</sub> was created. The structures shown in Figure S1 represent such a supercell with one possible Na<sup>+</sup>/Y<sup>3+</sup> distribution at the 1f sites.

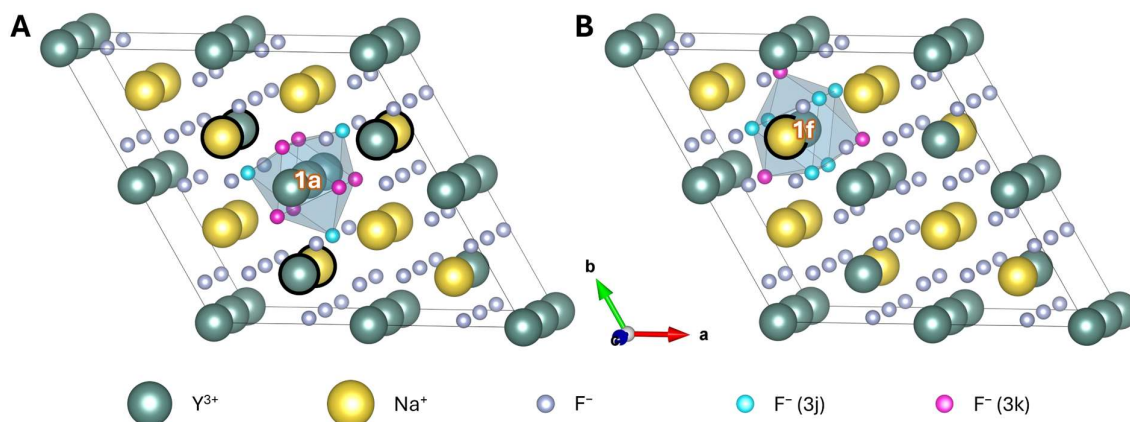

**Figure S1.** 2x2x2 supercell of  $\beta$ -NaYF<sub>4</sub> with the composition Na<sub>12</sub>Y<sub>12</sub>F<sub>48</sub>. Highlighted are a potential (A) 1a and (B) 1f doping site (white labels), and their first anionic (F<sup>-</sup> ions of the blue prism that are highlighted in cyan and pink) as well as cationic (Na<sup>+</sup> and Y<sup>3+</sup> ions marked with a thick black line) coordination spheres.

This distribution is very similar to the one reported to be the most probable based on experimentally derived X-ray diffraction patterns. However, in this work, we aim to address structural disorder, which means that all possible surroundings of each Y<sup>3+</sup> ion (potential Ln<sup>3+</sup> doping site) should be represented by configurations. The 2x2x2 supercell is not large enough to represent all possible (and required) Na<sup>+</sup>/Y<sup>3+</sup> distributions at the 1f sites. Specifically, for the 1f doping site (Figure S1B), the positions of the six 3j F<sup>-</sup> are heavily influenced by the two neighbouring 1f cations along the c-axis. For the 2x2x2 supercell shown, this means that, due to the periodic boundary conditions, the Y<sup>3+</sup> at the 1f site has two Na<sup>+</sup> as neighbouring ions along the c-axis. When creating a second configuration of this supercell by exchanging Na<sup>+</sup> for Y<sup>3+</sup> at this neighbouring 1f site, both neighbouring ions will correspond to Y<sup>3+</sup>. To instead account for such configurations in which one neighbouring cation is Na<sup>+</sup> and the other is Y<sup>3+</sup>, at least a 2x2x4 supercell is required (Figure 2B).

As for the 1f site, similar considerations made for the 1a site (Figure S1A) required a 2x2x4 supercell (Figure 2A). The reason for this is that three of the nine F<sup>-</sup> around the 1a site are located at 3j sites (Figure 1B). Each of these three sites is considerably influenced by the distribution of Na<sup>+</sup> and Y<sup>3+</sup> within a set of two closest 1f sites (large black circles in Figure S1A). In a 2x2x2 supercell eight such 1f sites exist, and the composition of the crystal remains stoichiometrically correct only if exactly four of these are occupied by Na<sup>+</sup> and the other four by Y<sup>3+</sup>. If instead six or five of the closest 1f sites are to be of the same type, additional 1f positions must be created to counterbalance the above average occurrence of either Na<sup>+</sup> or Y<sup>3+</sup>. In a 2x2x4 supercell, a total of 16 1f sites are available. By manipulating the 12 1f sites closest to the central site, all required configurations could be created without changing the stoichiometric ratio of the crystal.

## 2 $\text{LiYF}_4$ 3x3x1 Supercell

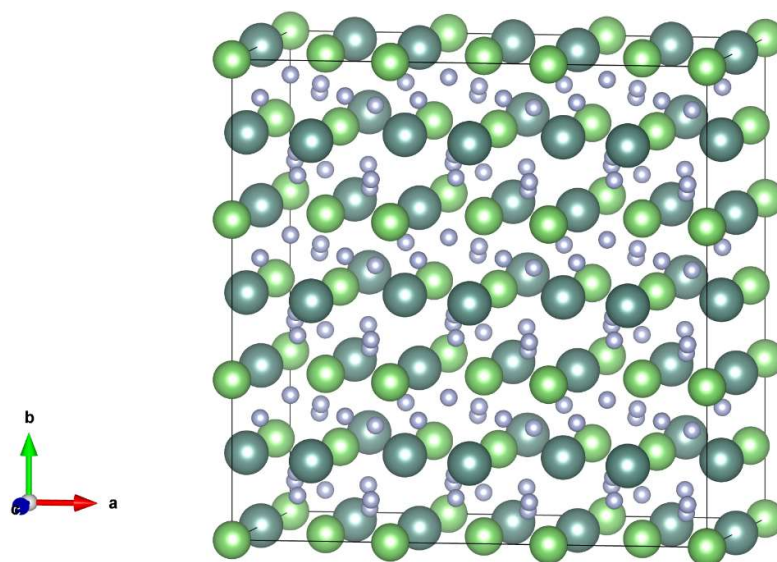

**Figure S2.** 3x3x1 supercell of  $\text{LiYF}_4$  with the composition  $\text{Li}_{36}\text{Y}_{36}\text{F}_{144}$ . Dark green spheres represent  $\text{Y}^{3+}$ , light green spheres  $\text{Li}^+$ , and small grey spheres  $\text{F}^-$ .

### 3 Additional Structural Parameters for $\beta$ -NaYF<sub>4</sub> doped with Er<sup>3+</sup>, Tm<sup>3+</sup>, and Yb<sup>3+</sup>

**Table S1.** Results of the structural optimisations for three times 16 different configurations of doped  $\beta$ -NaYF<sub>4</sub>. For the configurations doped with 4.2% Er<sup>3+</sup>, Tm<sup>3+</sup>, or Yb<sup>3+</sup> lattice energies relative to the most stable configuration of the respective column ( $\Delta E$ ) and deviations of the lattice parameters from the experimental values (Dev.<sub>LP</sub>) are being displayed.

|      |         | 4.2% Er <sup>3+</sup>                   |                           | 4.2% Tm <sup>3+</sup>                   |                           | 4.2% Yb <sup>3+</sup>                   |                           |
|------|---------|-----------------------------------------|---------------------------|-----------------------------------------|---------------------------|-----------------------------------------|---------------------------|
| Site | Config. | $\Delta E$<br>(kJ · mol <sup>-1</sup> ) | Dev. <sub>LP</sub><br>(%) | $\Delta E$<br>(kJ · mol <sup>-1</sup> ) | Dev. <sub>LP</sub><br>(%) | $\Delta E$<br>(kJ · mol <sup>-1</sup> ) | Dev. <sub>LP</sub><br>(%) |
| 1f   | 1       | 0.1                                     | 0.77                      | 0.2                                     | 0.77                      | 0.1                                     | 0.76                      |
|      | 2       | 2.4                                     | 0.83                      | 2.2                                     | 0.83                      | 1.9                                     | 0.83                      |
|      | 3       | 3.4                                     | 0.90                      | 3.4                                     | 0.90                      | 3.3                                     | 0.91                      |
| 1a   | 4       | 6.5                                     | 0.78                      | 6.6                                     | 0.78                      | 6.5                                     | 0.78                      |
|      | 5       | 4.6                                     | 0.85                      | 4.9                                     | 0.86                      | 4.6                                     | 0.86                      |
|      | 6       | 3.4                                     | 0.88                      | 4.1                                     | 0.91                      | 3.9                                     | 0.88                      |
|      | 7       | 1.8                                     | 0.89                      | 2.2                                     | 0.89                      | 1.9                                     | 0.90                      |
|      | 8       | 1.8                                     | 0.92                      | 2.0                                     | 0.92                      | 1.8                                     | 0.93                      |
|      | 9       | 1.2                                     | 0.86                      | 1.3                                     | 0.86                      | 1.2                                     | 0.85                      |
|      | 10      | 0.0                                     | 0.76                      | 0.0                                     | 0.76                      | 0.0                                     | 0.77                      |
|      | 11      | 1.6                                     | 0.86                      | 2.9                                     | 0.87                      | 2.5                                     | 0.88                      |
|      | 12      | 1.9                                     | 0.92                      | 2.2                                     | 0.92                      | 1.7                                     | 0.93                      |
|      | 13      | 2.3                                     | 0.86                      | 1.9                                     | 0.86                      | 1.9                                     | 0.88                      |
|      | 14      | 4.8                                     | 0.88                      | 4.7                                     | 0.89                      | 4.7                                     | 0.91                      |
|      | 15      | 4.2                                     | 0.84                      | 4.5                                     | 0.85                      | 4.0                                     | 0.85                      |
|      | 16      | 8.3                                     | 0.76                      | 7.4                                     | 0.76                      | 7.7                                     | 0.79                      |

## 4 LiYF<sub>4</sub> Input File

```

&GLOBAL
RUN_TYPE CELL_OPT
PROJECT_NAME LiYF4-Blank
PRINT_LEVEL LOW
&END GLOBAL
&MOTION
&GEO_OPT
OPTIMIZER LBFGS
MAX_ITER 500
STEP_START_VAL 1
&END GEO_OPT
&CELL_OPT
TYPE DIRECT_CELL_OPT
OPTIMIZER LBFGS
MAX_ITER 500
STEP_START_VAL 1
&END CELL_OPT
&PRINT
&TRAJECTORY SILENT
COMMON_ITERATION_LEVELS 300
FILENAME TRAJECTORY
&END TRAJECTORY
&END PRINT
&END MOTION
&FORCE_EVAL
METHOD QS
STRESS_TENSOR ANALYTICAL
&DFT
BASIS_SET_FILE_NAME ./basissets
POTENTIAL_FILE_NAME ./potentials
&SCF
MAX_SCF 500
EPS_SCF 9.9999999999999995E-07
SCF_GUESS ATOMIC
ADDED_MOS 150
&DIAGONALIZATION T
&END DIAGONALIZATION
&SMEAR T
METHOD FERMI_DIRAC
&END SMEAR
&MIXING T
METHOD DIRECT_P_MIXING
&END MIXING
&END SCF
&MGRID
CUTOFF 8.000000000000000E+02
REL_CUTOFF 6.000000000000000E+01
&END MGRID
&XC
DENSITY_CUTOFF 1.000000000000000E-10
GRADIENT_CUTOFF 1.000000000000000E-10
TAU_CUTOFF 1.000000000000000E-10
&XC_FUNCTIONAL NO_SHORTCUT
&PBE T
&END PBE
&END XC_FUNCTIONAL
&VDW_POTENTIAL
POTENTIAL_TYPE PAIR_POTENTIAL
&PAIR_POTENTIAL
R_CUTOFF 5.020000000000000E+01

```

```

TYPE DFTD3
PARAMETER_FILE_NAME dftd3.dat
REFERENCE_FUNCTIONAL PBE
&END PAIR_POTENTIAL
&END VDW_POTENTIAL
&END XC
&KPOINTS
SCHEME MONKHORST-PACK 2 2 3
&END KPOINTS
&PRINT
&MO on
EIGENVALUES
&EACH
  QS_SCF 0
&END EACH
&END MO
&END PRINT
&END DFT
&SUBSYS
&CELL
  A 1.5644593877023894E+001 0.0000000000000000E+000 0.0000000000000000E+000
  B 3.0751337049354889E-008 1.5644593901750460E+001 0.0000000000000000E+000
  C 1.8303734203235855E-008 -1.6648299085864796E-008 1.0796010118000813E+001
PERIODIC XYZ
MULTIPLE_UNIT_CELL 1 1 1
&END CELL
&COORD
!coordinates from crystal structure
&END COORD
&KIND Li
BASIS_SET ORB TZV2P-MOLOPT-SR-GTH
ELEMENT Li
POTENTIAL GTH-PBE
&END KIND
&KIND Y
BASIS_SET ORB TZV2P-MOLOPT-SR-GTH
ELEMENT Y
POTENTIAL GTH-PBE
&END KIND
&KIND F
BASIS_SET ORB TZV2P-MOLOPT-GTH
ELEMENT F
POTENTIAL GTH-PBE
&END KIND
&TOPOLOGY
NUMBER_OF_ATOMS 216
MULTIPLE_UNIT_CELL 1 1 1
&END TOPOLOGY
&PRINT
&ATOMIC_COORDINATES SILENT
  FILENAME SUBSYS_ATOMIC_COORDINATES
&END ATOMIC_COORDINATES
&SYMMETRY SILENT
  FILENAME SUBSYS_SYMMETRY
&END SYMMETRY
&END PRINT
&END SUBSYS
&END FORCE_EVAL

```

**5  $\beta$ -NaYF<sub>4</sub> Input File**

```

&GLOBAL
PRINT_LEVEL MEDIUM
PROJECT_NAME NaYF4_10-Blank
RUN_TYPE CELL_OPT
&END GLOBAL
&MOTION
&GEO_OPT
OPTIMIZER LBFGS
MAX_ITER 500
STEP_START_VAL 1
&END GEO_OPT
&CELL_OPT
OPTIMIZER LBFGS
MAX_ITER 500
STEP_START_VAL 38
TYPE DIRECT_CELL_OPT
&END CELL_OPT
&PRINT
&TRAJECTORY SILENT
COMMON_ITERATION_LEVELS 300
FILENAME TRAJECTORY
&END TRAJECTORY
&END PRINT
&END MOTION
&FORCE_EVAL
METHOD QS
STRESS_TENSOR ANALYTICAL
&DFT
BASIS_SET_FILE_NAME ./basissets
POTENTIAL_FILE_NAME ./potentials
&SCF
MAX_SCF 500
EPS_SCF 9.999999999999999E-07
SCF_GUESS ATOMIC
ADDED_MOS 150
&DIAGONALIZATION T
&END DIAGONALIZATION
&SMEAR T
METHOD FERMI_DIRAC
&END SMEAR
&MIXING T
METHOD PULAY_MIXING
ALPHA 5.000000000000000E-01
NBUFFER 15
&END MIXING
&END SCF
&MGRID
CUTOFF 8.000000000000000E+02
REL_CUTOFF 6.000000000000000E+01
&END MGRID
&XC
DENSITY_CUTOFF 1.000000000000000E-10
GRADIENT_CUTOFF 1.000000000000000E-10
TAU_CUTOFF 1.000000000000000E-10
&XC_FUNCTIONAL NO_SHORTCUT
&PBE T
&END PBE
&END XC_FUNCTIONAL
&VDW_POTENTIAL
POTENTIAL_TYPE PAIR_POTENTIAL

```

```

&PAIR_POTENTIAL
  R_CUTOFF 5.0200000000000003E+01
  TYPE DFTD3
  PARAMETER_FILE_NAME dftd3.dat
  REFERENCE_FUNCTIONAL PBE
&END PAIR_POTENTIAL
&END VDW_POTENTIAL
&END XC
&KPOINTS
  SCHEME MONKHORST-PACK 2 2 2
&END KPOINTS
&PRINT
  &MO ON
  EIGENVALUES T
  &EACH
    QS_SCF 0
  &END EACH
&END MO
&END PRINT
&END DFT
&SUBSYS
&CELL
  A 1.2056455649536725E+01 0.000000000000000E+00 0.000000000000000E+00
  B -5.9969696235235199E+00 1.0473148683213021E+01 0.000000000000000E+00
  C 1.2854716280689413E-03 -2.5761615563509414E-03 1.4150780327536356E+01
  PERIODIC XYZ
  MULTIPLE_UNIT_CELL 1 1 1
&END CELL
&COORD
!coordinates from crystal structure
&END COORD
&KIND Y
  BASIS_SET ORB TZV2P-MOLOPT-SR-GTH
  ELEMENT Y
  POTENTIAL GTH-PBE
  &POTENTIAL
4 6 1
0.475000000000000E+00 2 0.121677690400000E+02 -0.232855103000000E+01
3
0.246740700000000E+00 2 0.234502719500000E+02 -0.832535747999999E+01
0.107479902900000E+02
0.296563970000000E+00 2 0.597863401000000E+01 -0.585234964000000E+01
0.692459348000000E+01
0.450455690000000E+00 2 0.118749048000000E+01 -0.131867331000000E+01
0.149523499000000E+01
  # Potential name: GTH-PBE for symbol: Y
  # Potential read from the potential filename: ./potentials
&END POTENTIAL
&END KIND
&KIND Na
  BASIS_SET ORB TZV2Pd-MOLOPT-SR-GTH
  ELEMENT Na
  POTENTIAL GTH-PBE
  &POTENTIAL
3 6
0.236523220000000E+00 2 0.295104990000000E+00 -0.913884880000000E+00
2
0.143560460000000E+00 1 0.346014922800000E+02
0.129932240000000E+00 1 -0.142774616800000E+02
  # Potential name: GTH-PBE for symbol: NA
  # Potential read from the potential filename: ./potentials
&END POTENTIAL

```



```
&END KIND
&KIND F
BASIS_SET ORB TZV2P-MOLOPT-GTH
ELEMENT F
POTENTIAL GTH-PBE
&POTENTIAL
2 5
0.2149295900000000E+00 2 -0.2157302836000000E+02 0.3199776150000000E+01
2
0.1946840200000000E+00 1 0.2374354045000000E+02
0.1861560800000000E+00 0
# Potential name: GTH-PBE for symbol: F
# Potential read from the potential filename: ./potentials
&END POTENTIAL
&END KIND
&TOPOLOGY
NUMBER_OF_ATOMS 144
MULTIPLE_UNIT_CELL 1 1 1
&END TOPOLOGY
&PRINT
&ATOMIC_COORDINATES SILENT
FILENAME SUBSYS_ATOMIC_COORDINATES
&END ATOMIC_COORDINATES
&SYMMETRY SILENT
FILENAME SUBSYS_SYMMETRY
&END SYMMETRY
&END PRINT
&END SUBSYS
&END FORCE_EVAL
```

**6 LiYF<sub>4</sub> Optimised Structure**

A 1.5590789280516516E+001 0.0000000000000000E+000 0.0000000000000000E+000  
 B -2.8432707705266898E-007 1.5590790987587299E+001 0.0000000000000000E+000  
 C 1.9155742583311419E-007 5.3049961588265117E-006 1.0796216065757379E+001  
  
 Y -4.1607352347972938E-006 1.1809756185841686E-005 5.3980910013375230E+000  
 Y 6.3667099915062943E-006 2.5984518899919644E+000 8.0971728531118323E+000  
 Y -1.2870083174417532E-005 5.1969261318730480E+000 5.3981230435123582E+000  
 Y 3.3282662687771921E-006 1.2992340091253741E+001 8.0971420700317740E+000  
 Y 1.7203327690416883E-005 1.0393851432141476E+001 5.3981331851305754E+000  
 Y 8.2264748823394782E-006 7.7953993056505828E+000 8.0971777075019133E+000  
 Y 2.5984811898045725E+000 2.5984773314046961E+000 1.6860044854635764E-005  
 Y 2.5984586480688932E+000 -1.2616745458689936E-005 2.6990331188062133E+000  
 Y 2.5984565435460789E+000 1.2992302138747354E+001 -6.8092148192635361E-006  
 Y 2.5984676510297811E+000 5.1969293921933835E+000 2.6990767365099830E+000  
 Y 2.5984596667056965E+000 1.0393834314900527E+001 2.6990645563345574E+000  
 Y 5.1969223992334843E+000 8.7130522751939742E-006 5.3980915595330581E+000  
 Y 5.1969169339098267E+000 2.5984621677382553E+000 8.0971496884276899E+000  
 Y 5.1969482990175262E+000 5.1969394838367382E+000 5.3981102751122911E+000  
 Y 5.1969141616502501E+000 7.7954183240999475E+000 8.0971643962889281E+000  
 Y 5.1969320421950318E+000 1.2992337104925022E+001 8.0971401776973941E+000  
 Y 5.1969136080116298E+000 1.0393865954492828E+001 5.3981075139741304E+000  
 Y 7.7953809817596742E+000 1.2992325440424736E+001 1.1832391487551440E-005  
 Y 7.7954039134670898E+000 1.0393858532644071E+001 2.6990762559331989E+000  
 Y 7.7953754581786505E+000 4.6611133380840367E-006 2.6990349545563990E+000  
 Y 7.7953838199479257E+000 2.5984593921461698E+000 -1.3086188074244632E-005  
 Y 7.7953909660250966E+000 5.1969233704342352E+000 2.6990352468104972E+000  
 Y 7.7954149146569494E+000 7.7953856833174120E+000 -3.4534865780270547E-005  
 Y 1.0393829375663675E+001 2.5984732074344272E+000 8.0971547340419310E+000  
 Y 1.0393855576393110E+001 3.6557993507484617E-005 5.3981043398980955E+000  
 Y 1.0393870871444145E+001 1.2992338526226417E+001 8.0971729419064662E+000  
 Y 1.0393888592922343E+001 1.0393878338818357E+001 5.3981237093876784E+000  
 Y 1.0393853549813382E+001 5.1969240812783202E+000 5.3980962552668048E+000  
 Y 1.0393841545708394E+001 7.7953878163511359E+000 8.0971548495417274E+000  
 Y 1.2992313252664474E+001 -1.1664437386132348E-005 2.6990409086256069E+000  
 Y 1.2992310830541740E+001 2.5984779356181544E+000 -7.5019567628088851E-006  
 Y 1.2992335624611306E+001 5.1969309446580310E+000 2.6990656709648033E+000  
 Y 1.2992318349478776E+001 1.0393851774420511E+001 2.6990402773975184E+000  
 Y 1.2992340991306696E+001 1.2992322742253871E+001 -4.6589501555216913E-006  
 Y 1.2992313584283236E+001 7.7953832804741774E+000 -1.0201246915748443E-006  
 Li 6.9854658545623726E-006 3.6655449708764760E-006 -2.2619505397620094E-006  
 Li -1.9622576826813114E-007 2.5984685228623832E+000 2.6990511176820964E+000  
 Li -1.6085820713768719E-006 5.1969301073285914E+000 1.9021932788836594E-006  
 Li 5.5652163252846686E-006 1.2992324077172185E+001 2.6990554170195735E+000  
 Li -4.0322366718664773E-006 1.0393861447392641E+001 3.1246368151995270E-006  
 Li -4.9933715286457953E-006 7.7953907681496721E+000 2.6990497923779206E+000  
 Li 2.5984636235584246E+000 2.5984712760491719E+000 5.3981057602064864E+000  
 Li 2.5984602098299447E+000 6.7663744068666475E-006 8.0971629251575141E+000  
 Li 2.5984557318768915E+000 1.2992328457088389E+001 5.3980975210627866E+000  
 Li 2.5984639938151073E+000 5.1969352005952594E+000 8.0971582107677946E+000  
 Li 2.5984626515882145E+000 7.7953865474362436E+000 5.3981056154032414E+000  
 Li 2.5984630641065878E+000 1.0393868541538382E+001 8.0971635212317121E+000  
 Li 5.1969269817883497E+000 -4.9052950774385548E-006 -6.9192994813142087E-006  
 Li 5.1969280554078274E+000 2.5984688745180224E+000 2.6990551667483591E+000  
 Li 5.1969327505201957E+000 5.1969317201585188E+000 -9.1576560709166545E-006  
 Li 5.1969345920405647E+000 7.7953930644248217E+000 2.6990516375974893E+000  
 Li 5.1969239398883005E+000 1.2992324653845118E+001 2.6990496643048183E+000  
 Li 5.1969237986725725E+000 1.0393867960536465E+001 -4.4740895540839021E-006  
 Li 7.7953871096619531E+000 -2.2110503917875776E-006 8.0971555407072238E+000  
 Li 7.7953908744191338E+000 2.5984662858515279E+000 5.3981112198752097E+000

Li 7.7953909550361793E+000 5.1969361984899267E+000 8.0971691613320047E+000  
Li 7.7954010899221853E+000 7.7954003706426462E+000 5.3980989202358609E+000  
Li 7.7953920373013776E+000 1.0393868751746105E+001 8.0971550112393427E+000  
Li 7.7953919187999237E+000 1.2992329768386705E+001 5.3981062921299321E+000  
Li 1.0393862734702180E+001 2.5984665753352805E+000 2.6990454901021637E+000  
Li 1.0393856781115764E+001 -2.6744615386754152E-006 -3.0199084949118625E-006  
Li 1.0393855236201565E+001 1.2992323204339231E+001 2.6990478655680521E+000  
Li 1.0393858364625643E+001 1.0393861562105958E+001 -6.9707061175807123E-006  
Li 1.0393856164691362E+001 5.1969310433710874E+000 -1.6663856856115725E-006  
Li 1.0393851727856978E+001 7.7953953516145695E+000 2.6990530707985068E+000  
Li 1.2992327950156648E+001 2.5984603209230976E+000 5.3981077883937720E+000  
Li 1.2992323417000264E+001 7.7089940509272686E-006 8.0971593115704152E+000  
Li 1.2992321694898825E+001 5.1969320714425127E+000 8.0971592560795003E+000  
Li 1.2992320542999481E+001 1.0393863000518607E+001 8.0971686660207549E+000  
Li 1.2992325848942759E+001 1.2992333539789655E+001 5.3981063949654313E+000  
Li 1.2992318383137603E+001 7.7953970105328185E+000 5.3981148609287635E+000  
F 8.6714626503252068E-001 1.4145466746408667E+001 9.8995876562277800E+000  
F 8.6714934351583639E-001 1.1531421564677728E+000 3.5956770670375486E+000  
F 8.6715027778094012E-001 8.9485376366317944E+000 9.8995930089506672E+000  
F 8.6715034523207224E-001 1.1546996004761951E+001 3.5956812943748329E+000  
F 8.6715076362885923E-001 3.7516079582267015E+000 9.8995929765128032E+000  
F 8.6714869653908444E-001 6.3500695571753552E+000 3.5956809954871050E+000  
F 1.1531382368313590E+000 1.7313208782292868E+000 6.2947319896955998E+000  
F 1.1531368037439831E+000 1.4723646761785778E+001 7.2005323315403507E+000  
F 1.1531393295560568E+000 1.2125179670953392E+001 6.2947323126395895E+000  
F 1.1531402198761038E+000 9.5267163389628156E+000 7.2005371387886106E+000  
F 1.1531372897497005E+000 6.9282499185051698E+000 6.2947344574010131E+000  
F 1.1531368884843798E+000 4.3297854009970749E+000 7.2005356606464455E+000  
F 1.4453288778038293E+000 8.6715241347430994E-001 8.9662635469468277E-001  
F 1.4453286020945291E+000 3.4656170296416882E+000 1.8024324853167402E+000  
F 1.4453273572890963E+000 6.0640775881969224E+000 8.9662968006694443E-001  
F 1.4453237039574289E+000 8.6625395120700581E+000 1.8024293650635446E+000  
F 1.4453245157990220E+000 1.1261003069737557E+001 8.9662883429558171E-001  
F 1.4453248604251208E+000 1.3859474199296884E+001 1.8024262361574102E+000  
F 1.7313157667949699E+000 4.0437948487200019E+000 4.5014834484771482E+000  
F 1.7313180485568149E+000 1.4453350390328219E+000 8.9937912393469261E+000  
F 1.7313179133315644E+000 9.2407192626638412E+000 4.5014855921699768E+000  
F 1.7313176865752793E+000 6.6422622307970771E+000 8.9937900917154447E+000  
F 1.7313160125006393E+000 1.4437656350547581E+001 4.5014804055390716E+000  
F 1.7313145165679735E+000 1.1839189064013544E+001 8.9937827800216414E+000  
F 3.4656134963116667E+000 1.4145466125024681E+001 8.9937845860586716E+000  
F 3.4656108639340979E+000 1.1531420065453706E+000 4.5014786703248237E+000  
F 3.4656085869869480E+000 8.9485403772873440E+000 8.9937895748975620E+000  
F 3.4656106551587511E+000 1.1546998578553929E+001 4.5014836445373234E+000  
F 3.4656141071165569E+000 3.7516083085679348E+000 8.9937889150048633E+000  
F 3.4656146920689768E+000 6.3500709564295210E+000 4.5014825207746085E+000  
F 4.0437912844904336E+000 8.6715052630096157E-001 7.2005328187977149E+000  
F 4.0437921837254347E+000 3.4656180895960582E+000 6.2947307389758222E+000  
F 4.0437927323303517E+000 6.0640840467975448E+000 7.2005351326764391E+000  
F 4.0437859295156713E+000 8.6625467114807844E+000 6.2947325171116262E+000  
F 4.0437880828361310E+000 1.1261009634958929E+001 7.2005348891947207E+000  
F 4.0437894241031058E+000 1.3859477911002934E+001 6.2947282316287305E+000  
F 3.7516059920334848E+000 1.7313192288747117E+000 1.8024311600995055E+000  
F 3.7515998858977189E+000 1.4723640560427970E+001 8.9662408208849298E-001  
F 3.7515965686484454E+000 1.2125170901303472E+001 1.8024310389324911E+000  
F 3.7516002042219236E+000 9.5267091571925278E+000 8.9662698908914806E-001  
F 3.7516025139423661E+000 6.9282469683642978E+000 1.8024318188446711E+000  
F 3.7516068180246265E+000 4.3297874844461015E+000 8.9663032199174608E-001  
F 4.3297824257572666E+000 4.0437931143487704E+000 3.5956799585922088E+000  
F 4.3297825773766565E+000 1.4453339131408434E+000 9.8995909904385240E+000  
F 4.3297818829614982E+000 9.2407191440286720E+000 3.5956824697423531E+000  
F 4.3297797698031504E+000 6.6422633419557657E+000 9.8995916782536302E+000

Supporting Information – C. S. Conrad *et al.*

F 4.3297804953140648E+000 1.4437655459607795E+001 3.5956783640543932E+000  
F 4.3297814351389450E+000 1.1839192280620315E+001 9.8995848277621867E+000  
F 6.0640774014438525E+000 1.4145468079644814E+001 9.8995874110209261E+000  
F 6.0640764877519420E+000 1.1531429783323670E+000 3.5956776664477852E+000  
F 6.0640768515391699E+000 8.9485390320561038E+000 9.8995893506891495E+000  
F 6.0640760490491443E+000 1.1546999494342494E+001 3.5956830012410399E+000  
F 6.0640761747068508E+000 3.7516078608734005E+000 9.8995885607817513E+000  
F 6.0640779314716990E+000 6.3500695512908738E+000 3.5956779998505115E+000  
F 6.6422542353459910E+000 8.6714896533934793E-001 8.9662453705084055E-001  
F 6.6422537948326204E+000 3.4656126861600356E+000 1.8024267695132743E+000  
F 6.6422556239267339E+000 6.0640789615249098E+000 8.9662444412741527E-001  
F 6.6422574656662006E+000 8.6625442531211618E+000 1.8024276621136319E+000  
F 6.6422561765224382E+000 1.1261009007149717E+001 8.9662763206958096E-001  
F 6.6422550773618712E+000 1.3859475598222657E+001 1.8024300980365584E+000  
F 6.3500668501775070E+000 1.7313195443586329E+000 6.2947315669656732E+000  
F 6.3500654287420071E+000 1.4723648142384972E+001 7.2005305957187913E+000  
F 6.3500655140770297E+000 1.2125177329863071E+001 6.2947303534220183E+000  
F 6.3500640886225490E+000 9.5267171217836761E+000 7.2005352547280852E+000  
F 6.3500664950288490E+000 6.9282524362541160E+000 6.2947339297017786E+000  
F 6.3500680414554918E+000 4.3297842142279395E+000 7.2005355564157369E+000  
F 6.9282472908630144E+000 4.0437932874235782E+000 4.5014803116187725E+000  
F 6.9282449909869896E+000 1.4453318748006589E+000 8.9937854822129299E+000  
F 6.9282416325513640E+000 9.2407259709738039E+000 4.5014847042893749E+000  
F 6.9282428385197248E+000 6.6422649223018846E+000 8.9937863921049956E+000  
F 6.9282439214003286E+000 1.4437657413117554E+001 4.5014814500442162E+000  
F 6.9282439956869988E+000 1.1839193229173533E+001 8.9937856922701265E+000  
F 8.6625433571666264E+000 1.4145469056290416E+001 8.9937887925423485E+000  
F 8.6625418017602716E+000 1.1531410731483989E+000 4.5014811658884701E+000  
F 8.6625430133955170E+000 8.9485384459431145E+000 8.9937867627107124E+000  
F 8.6625447297416294E+000 1.1547001074958811E+001 4.5014837445688416E+000  
F 8.6625422244945032E+000 3.7516085265709420E+000 8.9937877555906596E+000  
F 8.6625417019366679E+000 6.3500681291949199E+000 4.5014790936880607E+000  
F 9.2407209385489359E+000 8.6715278882097757E-001 7.2005368450187879E+000  
F 9.2407200321731047E+000 3.4656153262546403E+000 6.2947334882874530E+000  
F 9.2407205854051799E+000 6.0640802844143975E+000 7.2005351793590942E+000  
F 9.2407233977249295E+000 8.6625483056545178E+000 6.2947335312665453E+000  
F 9.2407243516736699E+000 1.1261014502151740E+001 7.2005371525987751E+000  
F 9.2407231469357800E+000 1.3859478905525359E+001 6.2947342967191959E+000  
F 8.9485303808489185E+000 1.7313183923660798E+000 1.8024257771978627E+000  
F 8.9485319549526068E+000 1.4723643483890243E+001 8.9662639430995272E-001  
F 8.9485320965219604E+000 1.2125178517745043E+001 1.8024292757693394E+000  
F 8.9485330019244422E+000 9.5267125293137145E+000 8.9662523543198391E-001  
F 8.948531585989640E+000 6.9282467000105195E+000 1.8024265510012947E+000  
F 8.9485309043710632E+000 4.3297810423020415E+000 8.9662307435966981E-001  
F 9.5267101745398914E+000 4.0437928512267227E+000 3.5956773784046439E+000  
F 9.5267102984351446E+000 1.4453330086227874E+000 9.8995901199932259E+000  
F 9.5267131373668299E+000 9.2407249961367448E+000 3.5956813866984074E+000  
F 9.5267124920534467E+000 6.6422602969352980E+000 9.8995898897123276E+000  
F 9.5267100824033815E+000 1.4437656485121444E+001 3.5956784901832579E+000  
F 9.5267108765571393E+000 1.1839193670439025E+001 9.8995916315481853E+000  
F 1.1261011245102472E+001 1.4145468697097174E+001 9.8995925608286690E+000  
F 1.1261008660926882E+001 1.1531398900272150E+000 3.5956781450547934E+000  
F 1.1261007010311868E+001 8.9485367970622267E+000 9.8995891778824880E+000  
F 1.1261008482901490E+001 1.1547001180042509E+001 3.5956789250102621E+000  
F 1.1261005789856426E+001 3.7516091752278564E+000 9.8995894493789400E+000  
F 1.1261009054034419E+001 6.3500687303454013E+000 3.5956792156466069E+000  
F 1.1546998184640650E+001 1.7313216152899029E+000 6.2947346191050002E+000  
F 1.1546999032618034E+001 1.4723648624619575E+001 7.2005362195035199E+000  
F 1.1547000886197965E+001 1.2125183333497507E+001 6.2947357948303972E+000  
F 1.1546998434463548E+001 9.5267144282061036E+000 7.2005382798207753E+000  
F 1.1546995334585908E+001 6.9282475254817646E+000 6.2947330510934991E+000  
F 1.1546996134249035E+001 4.3297846172589169E+000 7.2005358559238211E+000

F 1.1839184713632656E+001 8.6714854520671858E-001 8.9662409845143276E-001  
F 1.1839188171999945E+001 3.4656164459868180E+000 1.8024299618219155E+000  
F 1.1839186287261846E+001 6.0640771814423342E+000 8.9662733238686687E-001  
F 1.1839184891349856E+001 8.6625426284388816E+000 1.8024269439971807E+000  
F 1.1839187036321169E+001 1.1261010284623570E+001 8.9662388992581743E-001  
F 1.1839185796181368E+001 1.3859472082369342E+001 1.8024249744417873E+000  
F 1.2125177755769595E+001 4.0437928288665850E+000 4.5014832714206721E+000  
F 1.2125174654321127E+001 1.4453323280105383E+000 8.9937873066977527E+000  
F 1.2125177137231582E+001 9.2407244335169736E+000 4.5014817759010697E+000  
F 1.2125175003958157E+001 6.6422604647562142E+000 8.9937871583210960E+000  
F 1.2125175873340865E+001 1.4437655520571150E+001 4.5014817009371404E+000  
F 1.2125178424349816E+001 1.1839191495470981E+001 8.9937886896068395E+000  
F 1.3859473327196888E+001 1.4145468244236735E+001 8.9937858055244178E+000  
F 1.3859470608358947E+001 1.1531402242855100E+000 4.5014793971657898E+000  
F 1.3859472693270433E+001 8.9485371033397918E+000 8.9937887532341314E+000  
F 1.3859473173351523E+001 1.1546999038719767E+001 4.5014825977021706E+000  
F 1.3859472089842804E+001 3.7516087488844563E+000 8.9937874109601363E+000  
F 1.3859473261764975E+001 6.3500710796188562E+000 4.5014844680383277E+000  
F 1.4145460237238620E+001 1.7313161829663606E+000 1.8024284241098563E+000  
F 1.4145463512899651E+001 1.4723642587034584E+001 8.9662425452932093E-001  
F 1.4145463124974867E+001 1.2125178373843953E+001 1.8024279831136765E+000  
F 1.4145461008170722E+001 9.5267102837574882E+000 8.9662381259859025E-001  
F 1.4145462612019076E+001 6.9282473594218414E+000 1.8024285591844160E+000  
F 1.4145462494534110E+001 4.3297831033043241E+000 8.9662802498349781E-001  
F 1.4437651323419271E+001 8.6715177368943053E-001 7.2005345966522203E+000  
F 1.4437649378262540E+001 3.4656156511401282E+000 6.2947336585169991E+000  
F 1.4437651141722355E+001 6.0640826058762052E+000 7.2005380249802409E+000  
F 1.4437652537355588E+001 8.6625462612241027E+000 6.2947356488209429E+000  
F 1.4437651283069114E+001 1.1261012182087908E+001 7.2005362909039148E+000  
F 1.4437651888948750E+001 1.3859479200838329E+001 6.2947315594595095E+000  
F 1.4723643376182999E+001 4.0437928627941089E+000 3.5956828253236202E+000  
F 1.4723639049736787E+001 1.4453326212248228E+000 9.8995908956473961E+000  
F 1.4723639853736614E+001 1.4437654360377497E+001 3.5956774305496464E+000  
F 1.4723643835858594E+001 1.1839191511252061E+001 9.8995877964168386E+000  
F 1.4723641012283322E+001 6.6422619085445014E+000 9.8995911546209676E+000  
F 1.4723642348853417E+001 9.2407238109665073E+000 3.5956799322709356E+000

**7  $\beta$ -NaYF<sub>4</sub> Optimised Structure (configuration 10)**

|    |                         |                         |                         |
|----|-------------------------|-------------------------|-------------------------|
| A  | 1.2056437308948636E+01  | 0.0000000000000000E+00  | 0.0000000000000000E+00  |
| B  | -5.9969677559366437E+00 | 1.0473134435223811E+01  | 0.0000000000000000E+00  |
| C  | 1.1946225120407898E-03  | -2.5457702667339905E-03 | 1.4150749505173852E+01  |
| Na | -3.0991034750626576E+00 | 8.7255508673403668E+00  | 2.0362000133700908E+00  |
| Na | -2.8216057271276478E+00 | 8.7268137878219161E+00  | 5.4728920595659591E+00  |
| Na | -3.1522734330892455E+00 | 8.7232878030521732E+00  | 8.6764918782534366E+00  |
| Na | -2.9285322605466177E+00 | 8.7249974384335811E+00  | 1.1942622203951792E+01  |
| Y  | -2.9636936093284114E+00 | 5.2737508804849842E+00  | -2.4579568525484536E-03 |
| Y  | -3.0021139092004887E+00 | 5.2474826649645694E+00  | 3.5377792126626564E+00  |
| Y  | -3.0286074422615141E+00 | 5.2212655313906673E+00  | 7.0667148650680245E+00  |
| Y  | -3.0044646450413381E+00 | 5.2409880576806129E+00  | 1.0618075665042904E+01  |
| Y  | 2.7676928998108814E-02  | 7.0066694411543997E+00  | 1.7640511039751179E+00  |
| Na | 2.2147865792835730E-02  | 6.9803603897049786E+00  | 5.1860830241629579E+00  |
| Y  | 1.9741214221277478E-03  | 7.0172065465228144E+00  | 8.824087502389320E+00   |
| Na | -3.2916672343578278E-02 | 6.9799061670760381E+00  | 1.2403130601026891E+01  |
| Y  | 4.1205529246391759E-02  | -2.1627011646898815E-03 | -3.3544400549856395E-03 |
| Y  | 2.0021275337053887E-03  | 1.2717468343624479E-02  | 3.5303877122026548E+00  |
| Y  | 6.874526331278852E-03   | 2.2196781203409947E-02  | 7.0766922334643576E+00  |
| Y  | -2.3405740878333713E-02 | 7.4088766400859157E-03  | 1.0607344632347841E+01  |
| Na | 1.2317124267511297E-01  | 3.4907353013595430E+00  | 1.8049385008340177E+00  |
| Na | -1.0111875385510047E-01 | 3.4888393350823494E+00  | 5.3003259474844588E+00  |
| Na | 6.9445567898141367E-02  | 3.4907005129505229E+00  | 8.9666699206485294E+00  |
| Na | -9.9935885285807338E-02 | 3.4868752230290334E+00  | 1.2346494685128219E+01  |
| Na | 2.9924971335532660E+00  | 1.6975224982966202E+00  | 1.7477473058894772E+00  |
| Y  | 3.0093141933466478E+00  | 1.7677064282492734E+00  | 5.3086239214342568E+00  |
| Na | 3.0201694673349042E+00  | 1.7442448555261099E+00  | 8.8511148060178435E+00  |
| Y  | 3.0261466494097360E+00  | 1.7726088496497989E+00  | 1.2369775241364819E+01  |
| Y  | 3.0170825822127703E+00  | 5.2461831089635433E+00  | 3.7884586607661803E-03  |
| Y  | 3.0449033105368568E+00  | 5.2537867386949779E+00  | 3.5325703355186664E+00  |
| Y  | 3.0280992601363423E+00  | 5.2239495359150734E+00  | 7.0832023231617347E+00  |
| Y  | 3.0149281985262282E+00  | 5.2779897597776140E+00  | 1.0610204476540366E+01  |
| Na | 3.2049408242013220E+00  | 8.7280972484962280E+00  | 1.5736173393530233E+00  |
| Na | 2.9822900336753055E+00  | 8.7255274759991259E+00  | 5.2400259512628020E+00  |
| Na | 3.1538909212806230E+00  | 8.7259950538880364E+00  | 8.6199115530486647E+00  |
| Na | 2.9286929911394970E+00  | 8.7239904854204617E+00  | 1.2401969872322317E+01  |
| Na | 6.0493169376768538E+00  | 6.9808644807952769E+00  | 1.7477820392905958E+00  |
| Y  | 6.0591996598359934E+00  | 7.0002283221529318E+00  | 5.3081425634270989E+00  |
| Na | 6.0487901079647655E+00  | 6.9794148718743347E+00  | 8.7942629378553079E+00  |
| Y  | 6.0333280485473475E+00  | 6.9998433027422040E+00  | 1.2390943173290411E+01  |
| Y  | 5.9862965973400275E+00  | -2.6385011880447097E-04 | -1.3243300082842109E-02 |
| Y  | 6.0405677048038973E+00  | 9.6568469874954189E-03  | 3.5337705743128351E+00  |
| Y  | 6.0593144228762137E+00  | 3.8356994520040329E-02  | 7.0620110520894501E+00  |
| Y  | 6.0459081549306255E+00  | -8.6235953132078273E-03 | 1.0616667585876977E+01  |
| Na | 5.9262976451905702E+00  | 3.4895630066648229E+00  | 1.4585304062565059E+00  |
| Na | 6.0977055972006706E+00  | 3.4898964208545711E+00  | 4.8953856389385866E+00  |
| Na | 5.9264307890623691E+00  | 3.4887262564410939E+00  | 9.2552243407602077E+00  |
| Na | 6.2051527056818934E+00  | 3.4893259640267926E+00  | 1.2576284638990971E+01  |
| Y  | 9.0386759186532970E+00  | 1.7719891811044683E+00  | 1.7505968090580668E+00  |
| Na | 9.0471988056332329E+00  | 1.7442940455908142E+00  | 5.1861508547724284E+00  |
| Y  | 9.0401647369475349E+00  | 1.7562278524129837E+00  | 8.8215454137717888E+00  |
| Na | 9.0483813158526996E+00  | 1.7422561488209980E+00  | 1.2402963816296724E+01  |
| F  | -3.6996154088102351E+00 | 6.5423271330404891E+00  | 1.7512305857247310E+00  |
| F  | -3.7341993558442637E+00 | 6.5117986585842731E+00  | 8.8557750195367806E+00  |
| F  | -3.6456337806220658E+00 | 6.6545072942872316E+00  | 5.2945413465026991E+00  |
| F  | -3.6471594244791388E+00 | 6.6507419165776938E+00  | 1.2399984155122056E+01  |
| F  | -6.4162368670822800E-01 | 1.4104641198215093E+00  | 1.7493709463400291E+00  |
| F  | -6.5529904129718164E-01 | 1.4123069299928366E+00  | 8.8461988207992981E+00  |
| F  | -7.2502088816499843E-01 | 1.2861937010179649E+00  | 5.2978316408890365E+00  |
| F  | -7.1831073927331279E-01 | 1.2898921741385974E+00  | 1.2399116761763890E+01  |

|   |                         |                        |                         |
|---|-------------------------|------------------------|-------------------------|
| F | -1.4435674214181957E+00 | 5.1478959465662628E+00 | 1.8037991474273196E+00  |
| F | -1.4652801214513425E+00 | 5.1868754155384531E+00 | 8.8481246168557881E+00  |
| F | -1.5191040996638239E+00 | 5.1865829839440849E+00 | 5.2977717077429913E+00  |
| F | -1.4939425134928279E+00 | 5.1875227612645904E+00 | 1.2351391442314068E+01  |
| F | -4.4877614261915619E+00 | 1.0418458869996577E+01 | 1.7955628443427969E+00  |
| F | -4.5067857837070440E+00 | 1.0432082593669776E+01 | 8.8549950621054698E+00  |
| F | -4.4517085746233915E+00 | 1.0412102608813866E+01 | 5.2987352573563165E+00  |
| F | -4.4442238003774435E+00 | 1.0384572551272134E+01 | 1.2348206944148341E+01  |
| F | -1.5910384236647890E+00 | 7.1138616294230017E+00 | 1.6738082230576737E-01  |
| F | -1.7054853478996204E+00 | 7.1768108485051583E+00 | 7.2212900725916596E+00  |
| F | -1.6534484494954984E+00 | 7.1737608956181802E+00 | 3.3791461507506990E+00  |
| F | -1.7003139275637507E+00 | 7.1773225213808951E+00 | 1.0476012533264903E+01  |
| F | 1.3708588638109780E+00  | 1.9014278077617766E+00 | -1.6837956839842735E-01 |
| F | 1.3302660462716003E+00  | 1.9062603602512564E+00 | 6.9274105933562904E+00  |
| F | 1.3421624528764475E+00  | 1.9336283040212701E+00 | 3.6719339388952079E+00  |
| F | 1.3349477886089585E+00  | 1.9362233672681577E+00 | 1.0771674280726648E+01  |
| F | 3.7149554626577341E+00  | 2.9785520828753242E-01 | -1.7885193349785156E-01 |
| F | 3.7307613755173104E+00  | 1.9841302904127475E-01 | 6.8759282175736258E+00  |
| F | 3.7307310769552764E+00  | 2.0552201013258792E-01 | 3.7259418043785377E+00  |
| F | 3.7157384732662044E+00  | 2.4109531568083378E-01 | 1.0772308854388074E+01  |
| F | 7.2116689010414936E-01  | 5.4407356600880217E+00 | 1.8226073346915619E-01  |
| F | 7.1500706360651411E-01  | 5.4867024909524025E+00 | 7.2288598188425324E+00  |
| F | 7.2115213902095632E-01  | 5.4800234739495650E+00 | 3.3718889941291876E+00  |
| F | 7.0887035306424429E-01  | 5.4765509263338874E+00 | 1.0425166199579582E+01  |
| F | 2.2976212538868004E+00  | 3.9682985476626937E+00 | 1.7930310036762565E+00  |
| F | 2.2525184582529043E+00  | 3.9827318023832814E+00 | 8.8546496728076871E+00  |
| F | 2.1277243781145785E+00  | 3.9725630809857488E+00 | 5.2971303898013247E+00  |
| F | 2.1356577346332708E+00  | 3.9685655949738656E+00 | 1.2398966269558679E+01  |
| F | -8.6983047700233351E-01 | 9.2066091047970673E+00 | 1.7525976710093352E+00  |
| F | -8.7202052638438965E-01 | 9.2062578949845282E+00 | 8.8476025494932742E+00  |
| F | -6.8559749920943935E-01 | 9.2128029446714681E+00 | 5.2993207987050743E+00  |
| F | -7.5612552602526584E-01 | 9.2118983646271744E+00 | 1.2396730170880376E+01  |
| F | 1.0070379654992516E+00  | 8.3795687720008978E+00 | 1.7255514362977167E-01  |
| F | 1.0003750661289981E+00  | 8.3825530525581673E+00 | 7.2272715021884784E+00  |
| F | 1.0006076310773844E+00  | 8.3788377875417126E+00 | 3.3700756489939163E+00  |
| F | 9.6370884171211513E-01  | 8.3459938977241706E+00 | 1.0475967805641483E+01  |
| F | 4.0500891467783120E+00  | 3.1521042137403925E+00 | -1.7493675366197861E-01 |
| F | 3.9198099568099893E+00  | 3.1011624758210838E+00 | 6.9255410593765623E+00  |
| F | 4.0041931882408734E+00  | 3.1361515712075709E+00 | 3.7235688675386203E+00  |
| F | 4.0000887639191802E+00  | 3.1534704663801487E+00 | 1.0774191396871027E+01  |
| F | 2.3817452812901569E+00  | 6.6567638302192389E+00 | 1.7544659288545998E+00  |
| F | 2.3674660130494254E+00  | 6.6708280632893295E+00 | 8.8479191801361914E+00  |
| F | 2.3337618075620141E+00  | 6.5393898862047823E+00 | 5.2995280735520494E+00  |
| F | 2.2857120836234648E+00  | 6.5389839030449419E+00 | 1.2401804920684045E+01  |
| F | 5.2937612421033409E+00  | 1.3041427453119414E+00 | 1.7564569133843000E+00  |
| F | 5.3336478098838125E+00  | 1.3033579153755408E+00 | 8.8519410299453032E+00  |
| F | 5.3873216645207265E+00  | 1.4177763267799166E+00 | 5.3002227867023057E+00  |
| F | 5.3813446663855631E+00  | 1.4265865261149759E+00 | 1.2347093500883837E+01  |
| F | 1.5698046780210519E+00  | 1.0422444412081461E+01 | 1.7472170989681377E+00  |
| F | 1.5895917671699351E+00  | 1.0375613287876844E+01 | 8.8532168332461101E+00  |
| F | 1.5546458559295084E+00  | 1.0423695774665839E+01 | 5.2932080747435046E+00  |
| F | 1.5135928596577322E+00  | 1.0418588579471976E+01 | 1.2402266747507877E+01  |
| F | 4.5275011800404519E+00  | 5.1835913741550321E+00 | 1.7507339995495759E+00  |
| F | 4.5126359099028353E+00  | 5.1855941426593599E+00 | 8.8522965028941343E+00  |
| F | 4.5880838893614131E+00  | 5.1565352259792556E+00 | 5.3057419726556958E+00  |
| F | 4.5640905448108766E+00  | 5.1817815981520878E+00 | 1.2400661922279541E+01  |
| F | 4.3657166202436137E+00  | 7.1752273494540919E+00 | -1.2176601637749769E-01 |
| F | 4.3763659896367075E+00  | 7.1717504639781993E+00 | 6.9289343758135846E+00  |
| F | 4.4014953633451697E+00  | 7.1395201310277647E+00 | 3.6707015249814647E+00  |
| F | 4.3729960518962159E+00  | 7.1660566929655092E+00 | 1.0774602171194998E+01  |
| F | 7.3334768896687539E+00  | 1.9516367464199027E+00 | 1.2024438497023203E-01  |
| F | 7.4311534042043572E+00  | 1.8661620114942663E+00 | 7.2190727917252770E+00  |

Supporting Information – C. S. Conrad *et al.*

|   |                        |                        |                         |
|---|------------------------|------------------------|-------------------------|
| F | 7.3700908573120634E+00 | 1.9363038432004465E+00 | 3.3761475972474595E+00  |
| F | 7.3981611454287917E+00 | 1.8982406990077132E+00 | 1.0480773974211512E+01  |
| F | 9.7432074115863969E+00 | 2.3734192100095650E-01 | 1.7546057494284542E-01  |
| F | 9.7665025143652464E+00 | 1.9689488267415270E-01 | 7.2290516874559074E+00  |
| F | 9.7461562683690897E+00 | 2.3939615581518128E-01 | 3.3580664354504379E+00  |
| F | 9.7455155154789619E+00 | 2.3994521070208016E-01 | 1.0426173452229072E+01  |
| F | 6.7469320812438349E+00 | 5.4827433989947263E+00 | 3.6756108681244020E+00  |
| F | 6.7390791369626033E+00 | 5.4243415332274347E+00 | 1.0828712161006459E+01  |
| F | 6.7400450163356664E+00 | 5.4322523489956511E+00 | -1.7541612916177868E-01 |
| F | 6.7599141646544307E+00 | 5.5333227073133884E+00 | 6.9182662360789058E+00  |
| F | 5.3337534913915015E+00 | 9.2138308881398849E+00 | 1.7536282788980915E+00  |
| F | 5.3260625632758556E+00 | 9.2078316352149514E+00 | 8.8472351275027403E+00  |
| F | 5.1882039557641066E+00 | 9.1840890679114349E+00 | 5.3029035964200242E+00  |
| F | 5.1591831691148569E+00 | 9.2064649027910832E+00 | 1.2397939387211515E+01  |
| F | 8.2723099070860915E+00 | 3.9769184928956998E+00 | 5.2959296507600362E+00  |
| F | 8.3390906704527001E+00 | 3.9710857784224429E+00 | 1.2400413684163414E+01  |
| F | 8.1589347256693028E+00 | 3.9724038423101597E+00 | 1.7498793822057461E+00  |
| F | 8.1414516145474067E+00 | 3.9402335962540582E+00 | 8.8510649104376480E+00  |
| F | 7.0407030816488030E+00 | 8.3781269986191891E+00 | 3.7190304314305132E+00  |
| F | 7.0103890683851668E+00 | 8.3433472084050262E+00 | 1.0773348524659545E+01  |
| F | 6.9986920168420044E+00 | 8.3447744413683882E+00 | -1.7415865674029460E-01 |
| F | 7.0803973323468776E+00 | 8.3901051943809630E+00 | 6.9262491728249982E+00  |
| F | 1.0003910366208904E+01 | 3.1088628806286205E+00 | 3.3754918706323171E+00  |
| F | 1.0037057590204213E+01 | 3.1432825676067369E+00 | 1.0425639004683530E+01  |
| F | 1.0030885008289502E+01 | 3.1457084455115703E+00 | 1.7393274440645973E-01  |
| F | 1.0027468752057370E+01 | 3.1426772653612911E+00 | 7.2263667944613657E+00  |
